# Supplementary material for: Hypoxia Alters Epigenetic and N-Glycosylation Profiles of Ovarian and Breast Cancer Cell Lines in-vitro
Source: Front Oncol. 2020 Jul 29;10:1218. doi: 10.3389/fonc.2020.01218 (PMC7405916; doi:10.3389/fonc.2020.01218)
Supplement: Table S1 — List of all glycans from all 6 cell lines and how they were pooled into features. [file Table_1.XLSX]

## Sheet: Table S1
Supplementary Table S1. List of all glycans from 6 cell lines																				A2780 cell line																							A2780cis cell line
Peak number	A2780			A2780cis			PEO1			PEO4			MDA-MB-231			MDA-MB-436			Glycans found	Fucosylated					Oligoman	Hybrids	Bisects	Lacs (no oaf)	Lacs+oaf	Branching				Galactosylation				Sialylation					Fucosylated					Oligoman	Hybrids
	GU	peak % area	glycan % area	GU	peak % area	glycan % area	GU	peak % area	glycan % area	GU	peak % area	glycan % area	GU	peak % area	glycan % area	GU	peak % area	glycan % area		core only	core	outer arm only	outer arm	both core and outer arm fucose						A1	A2	A3	A4	G0	G1	G2	G3	S0	S1	S2	S3	S4	core only	core	outer arm only	outer arm	both core and outer arm fucose
1	5.89	0.15	0.09	5.89	0.12	0.03	5.89	0.17	0.22	5.98	0.51	0.33	5.98	0.32	0.05	5.89	0.24	0.03	FA1G1	1	1	1	1	1	1	1	1	1	1	1	1	1	1	1	1	1	1	1	1	1	1	1	1	1	1	1	1	1	1
			0.06			0.09			0			1.29			0			0.21	FA2
			0			0			0			0			1.62			0	M5
2	6.21	0.95	0.73	6.21	0.76	0.51	6.22	0.94	0.74	6.22	1.49	0	6.22	1.37	0	6.22	1.83	1.81	M5	2	2	2	2	2	2	2	2	2	2	2	2	2	2	2	2	2	2	2	2	2	2	2	2	2	2	2	2	2	2
			0.01			0			0			0			0.01			0	FA2B
			0.01			0			0			0			0.01			0	FA3
			0.1			0.1			0.1			0.27			0			0.02	FA2[6]G1
			0.13			0.13			0.13			0.26			0.1			0.01	A2G1
3	6.71	0.13	0.03	6.72	0.08	0.03	6.73	0.13	0.03	6.7	1.26	0.16	6.71	0.3	0.2	6.72	0.29	0.08	A1G1S[6]1	3	3	3	3	3	3	3	3	3	3	3	3	3	3	3	3	3	3	3	3	3	3	3	3	3	3	3	3	3	3
			0.1			0.1			0.1			1.11			0			0.2	FA2[3]G1
4	6.86	0.1	0.1	6.86	0.07	0.07	6.86	0.11	0.11	6.86	0.25	0.25	6.85	0.11	0	6.87	0.15	0.15	A2F1G1	4	4	4	4	4	4	4	4	4	4	4	4	4	4	4	4	4	4	4	4	4	4	4	4	4	4	4	4	4	4
5	7	0.12	0.12	7.08	0.05	0.05	7.06	0.03	0.03	6.93	0.17	0.17	7.03	0.05	0	7.08	0.18	0.18	A2F1G1	5	5	5	5	5	5	5	5	5	5	5	5	5	5	5	5	5	5	5	5	5	5	5	5	5	5	5	5	5	5
6	7.13	0.26	0.26	7.13	0.25	0.25	7.13	0.29	0.29	7.14	0.47	0.47	7.13	0.55	0.71	7.14	0.65	0.63	A2F1G1	6	6	6	6	6	6	6	6	6	6	6	6	6	6	6	6	6	6	6	6	6	6	6	6	6	6	6	6	6	6
			0			0			0			0			0			0.02	FA2BG1
7	7.23	0.11	0.11	7.23	0.1	0.1	7.23	0.13	0.13	7.25	0.48	0.48	7.22	0.16	0.16	7.24	0.21	0.03	A2F1G1	7	7	7	7	7	7	7	7	7	7	7	7	7	7	7	7	7	7	7	7	7	7	7	7	7	7	7	7	7	7
			0			0			0			0			0			0.01	FA3G1
8	7.27	0.05	0	7.3	0.02	0	7.28	0.02	0	7.3	0.12	0.12	7.38	0.12	0	7.29	0.01	0	A2F1G1	8	8	8	8	8	8	8	8	8	8	8	8	8	8	8	8	8	8	8	8	8	8	8	8	8	8	8	8	8	8
			0.01			0			0			0			0			0.01	FA2BG1
			0.01			0			0			0			0			0.01	FA3G1
			0.02			0.02			0.02			0			0.12			0.15	M6
			0			0.01			0			0			0.05			0	A2G2
			0			0			0			0			0.01			0.01	A2BG2
9	7.4	0.07	0.01	7.4	0.06	0.01	7.4	0.07	0.01	7.41	0.08	0.01	7.46	0.06	0	7.41	0.17	0.01	FA2BG1	9	9	9	9	9	9	9	9	9	9	9	9	9	9	9	9	9	9	9	9	9	9	9	9	9	9	9	9	9	9
			0.06			0.05			0.06			0.06			0			0.16	FA3G1
			0			0			0			0.01			0			0	A2G1S1
10	7.64	0.4	0.2	7.64	0.38	0.2	7.64	0.44	0.44	7.65	1.68	2.41	7.62	0.41	0.2	7.65	0.62	0.2	M5A1G1	10	10	10	10	10	10	10	10	10	10	10	10	10	10	10	10	10	10	10	10	10	10	10	10	10	10	10	10	10	10
			0.2			0.18			0			0			0.21			0.42	FA2G2
11	7.74	0.02	0.01	7.79	0.01	0.01	7.79	0.03	0.01	7.77	0.75	0.01	7.75	0.02	0.01	7.73	0.02	0.01	FA2BG2	11	11	11	11	11	11	11	11	11	11	11	11	11	11	11	11	11	11	11	11	11	11	11	11	11	11	11	11	11	11
			0.01			0.01			0.02			0.01			0.01			0.01	FA3G2
12	7.85	0.73	0.2	7.85	0.59	0.2	7.85	0.68	0.2	7.86	1.19	1.38	7.85	0.93	0.2	7.86	1.22	0.2	M7	12	12	12	12	12	12	12	12	12	12	12	12	12	12	12	12	12	12	12	12	12	12	12	12	12	12	12	12	12	12
			0.15			0.14			0.8			0.8			0.69			0	M4A1G1S1
			0			0			0			0.02			0.02			0	A2BG1S1
13	8.04	0.32	0	8.04	0.56	0	8.04	0.36	0	8.04	1.05	0.02	8.04	0.41	0.02	8.05	0.66	0.7	A3G1S1	13	13	13	13	13	13	13	13	13	13	13	13	13	13	13	13	13	13	13	13	13	13	13	13	13	13	13	13	13	13
			0.7			0.81			0.04			0.02			0.41			0.94	A2G2S1
			0			0			0			0			0			0.02	FA2G[6]1S1
			0			0			0			0			0			0.02	FA2BG1S1
14	8.28	1.41	0	8.29	1.46	0	8.29	1.55	0	8.3	2.46	0	8.28	2.08	0.02	8.3	2.64	0.1	FA2G[3]1S1	14	14	14	14	14	14	14	14	14	14	14	14	14	14	14	14	14	14	14	14	14	14	14	14	14	14	14	14	14	14
			0			0			0			0			0			0.91	FA2F2G1
			0			0			0			0			0.5			0	A3F2G1
			0			0.01			0			2.1			0			0	A3G3
			1.25			1.3			1.39			0.2			1.4			1.67	A2G2S1
			0.16			0.16			0.16			0.16			0.16			0.16	FA2F2G2
15	8.49	0.16	0.13	8.48	0.21	0.18	8.48	0.25	0.24	8.5	0.6	0	8.52	0.23	0	8.5	0.43	0.11	M8	15	15	15	15	15	15	15	15	15	15	15	15	15	15	15	15	15	15	15	15	15	15	15	15	15	15	15	15	15	15
			0.02			0.02			0			0			0.03			0.1	FA2G2S1
			0.01			0.01			0.01			0.6			0.2			0.02	FA2F2G2
16	8.58	0.28	0.2	8.58	0.39	0.2	8.58	0.42	0.2	8.6	0.43	0	8.57	0.47	0	8.59	0.61	0.21	M8	16	16	16	16	16	16	16	16	16	16	16	16	16	16	16	16	16	16	16	16	16	16	16	16	16	16	16	16	16	16
			0			0			0			0.02			0.12			0	FA3G3
			0.02			0.02			0			0			0.15			0.1	FA2G2S1
			0.06			0.06			0.22			0.06			0.2			0.3	FA2F2G2
17	8.71	0.41	0	8.71	0.69	0	8.7	0.71	0	8.71	0.9	0	8.7	0.75	0.05	8.72	0.96	0	A3F1G3	17	17	17	17	17	17	17	17	17	17	17	17	17	17	17	17	17	17	17	17	17	17	17	17	17	17	17	17	17	17
			0.41			0.69			1.2			1.5			0.66			0.4	M5A2BF1G2Lac1S(6)1
			0			0			0.01			0.01			0.01			0.01	FA2BG2S1
			0			0			0.4			0.01			0.03			0.1	FA3G2S1
			0			0			0.99			0.05			0			0	A2F1G1Lac1S1
			0			0			0			0			0.34			0.3	FA2G1Lac1S1
			0			0			0			0			0			0.1	A3'BG3
			0			0			0			0			0			0.05	A4G3
18	9.02	5.29	0	9.02	6.01	0	9.02	5.72	0	9.03	6.84	0	9.01	7.02	0	9.03	7.72	0.1	FA2G2S1	18	18	18	18	18	18	18	18	18	18	18	18	18	18	18	18	18	18	18	18	18	18	18	18	18	18	18	18	18	18
			0			0			0			0.01			0			0.2	A2BG2S1
			0			0			0			0.1			0			0.2	A3G2S1
			0			0			0			0			0			0.37	FA3'G3
			4.79			5.51			3.72			5.86			6.58			6.65	A2G2S2
			0.5			0.5			0.11			0.2			0.1			0.2	FA2G2S2
19	9.45	4.25	2.95	9.45	4.52	2.95	9.45	4.45	3.94	9.46	5.34	3.12	9.43	5.59	5.33	9.45	6.14	4.41	A2G2S2	19	19	19	19	19	19	19	19	19	19	19	19	19	19	19	19	19	19	19	19	19	19	19	19	19	19	19	19	19	19
			0			0.02			0.01			0.02			0.01			0.01	FA2BG2S1
			0			0.03			0.5			0.6			0.25			0.25	FA3G2S1
			0			0			0			0.5			0			0	FA2F2G2S1
			0			0			0			0.1			0			0.47	A4G4
20	9.63	0.37	0	9.68	0.46	0	9.68	0.48	0	9.66	0.69	0	9.65	0.31	0.1	9.68	0.64	0	A3F2G2S1	20	20	20	20	20	20	20	20	20	20	20	20	20	20	20	20	20	20	20	20	20	20	20	20	20	20	20	20	20	20
			0.37			0.46			0.48			0.1			0.2			0.01	FA2G2S2
21	9.76	2.06	0.3	9.8	3.05	0.3	9.76	2.3	0.8	9.76	2.85	0.3	9.74	2.19	0	9.76	2.2	0.02	A2G2S2	21	21	21	21	21	21	21	21	21	21	21	21	21	21	21	21	21	21	21	21	21	21	21	21	21	21	21	21	21	21
			0.02			0.02			0			0			0.02			0.02	FA2G2S2
			3.04			4.25			1.2			4.14			2.18			3.79	A3G3S2
22	9.91	0.78	0.46	9.92	0.72	0.4	9.92	0.91	0	9.9	1.28	0.76	9.89	0.98	0	9.92	1.05	0	A2G2S2	22	22	22	22	22	22	22	22	22	22	22	22	22	22	22	22	22	22	22	22	22	22	22	22	22	22	22	22	22	22
			0.3			0.3			0.3			0.3			0.3			0.22	A2BG2S2
			0.02			0.02			0.3			0.02			0.02			0.02	FA2G2S2
			0			0			0			0.2			0.47			0.47	A3F2G3
			0			0			0			0			0			0.34	A3G3S1
23	10.06	0.69	0.01	10.06	0.8	0.01	10.06	0.8	0	10.06	1.29	0.01	10.04	0.74	0	10.06	0.77	0	A2G2S2	23	23	23	23	23	23	23	23	23	23	23	23	23	23	23	23	23	23	23	23	23	23	23	23	23	23	23	23	23	23
			0.3			0.3			0.3			0.3			0.3			0.22	A2BG2S2
			0.4			0.4			0.1			0.1			0.1			0.4	FA2G2S2
24	10.18	7.13	0.71	10.19	6.81	0.71	10.18	7.03	0.71	10.18	9.66	0	10.16	7.05	0	10.19	7.24	0	FA3BG3S1	24	24	24	24	24	24	24	24	24	24	24	24	24	24	24	24	24	24	24	24	24	24	24	24	24	24	24	24	24	24
			0			0			0			0			0.1			0.6	FA2G2S2
			6.4			5.19			6.83			9.04			7.08			6.39	A3G3S2
			0			1			0.2			1.5			0.4			0.4	FA3F1G3S(3)1
25	10.48	2.66	0	10.48	2.75	0	10.48	2.89	0	10.48	2.72	1	10.46	2.77	0	10.49	2.78	1.2	A3F1G2S1	25	25	25	25	25	25	25	25	25	25	25	25	25	25	25	25	25	25	25	25	25	25	25	25	25	25	25	25	25	25
			1.06			1.15			1.29			1.12			1.47			1.28	A3G3S2
			1			1			1			0			1			0	FA3BG3S1
			0.6			0.6			0.6			0.6			0.3			0.3	FA3F1G3S2/A3F2G3S2/FA2F1G2Lac1S2
26	10.63	3.25	3.25	10.64	3.3	3.3	10.63	3.24	3.24	10.63	4.71	4.21	10.62	2.82	2.82	10.64	2.89	2.59	A3G3S3	26	26	26	26	26	26	26	26	26	26	26	26	26	26	26	26	26	26	26	26	26	26	26	26	26	26	26	26	26	26
			0			0			0			0.5			0			0.3	A3F1G2S1
27	10.78	1.07	1.07	10.77	0.97	0.97	10.78	1.33	1.33	10.76	0.98	0.98	10.76	0.84	0.84	10.79	0.83	0.83	A3G3S2	27	27	27	27	27	27	27	27	27	27	27	27	27	27	27	27	27	27	27	27	27	27	27	27	27	27	27	27	27	27
															0				A3G3S2(acet)
28	10.92	22.84	13.54	10.92	22.32	13.02	10.92	21.88	13.58	10.91	16.71	9.35	10.9	23.25	20.95	10.92	22.09	13.49	A3G3S3	28	28	28	28	28	28	28	28	28	28	28	28	28	28	28	28	28	28	28	28	28	28	28	28	28	28	28	28	28	28
			0.3			0.3			0.3			0.3			0.3			0.3	FA3F1G3S2
29	11.06	0.94	0.94	11.06	0.94	0.94	11.06	1.09	1.09	11.07	1.43	1.43	11.02	0.67	0.67	11.05	0.55	0.55	*A3G3S3	29	29	29	29	29	29	29	29	29	29	29	29	29	29	29	29	29	29	29	29	29	29	29	29	29	29	29	29	29	29
			2			2			2			0.06			0.2			0.8	FA3G3KDN3
			7			7			6			7			1.8			7.5	A3F1G3KDN3
30	11.24	0.75	0.75	11.25	0.87	0.87	11.24	0.9	0.9	11.22	1.04	1.04	11.22	0.63	0.63	11.25	0.71	0.71	A3G3S3	30	30	30	30	30	30	30	30	30	30	30	30	30	30	30	30	30	30	30	30	30	30	30	30	30	30	30	30	30	30
31	11.34	22.37	0.01	11.34	22.04	0.01	11.34	21.19	0.01	11.33	16.06	0.01	11.32	22.07	0.01	11.34	20.72	0.01	FA3'BF1G1S1	31	31	31	31	31	31	31	31	31	31	31	31	31	31	31	31	31	31	31	31	31	31	31	31	31	31	31	31	31	31
			0.7			0.7			0.7			0.7			0.7			0.7	A3G3S2(acet)
			0.01			0.01			0.01			0.01			0.01			0.01	M5A1G1S1
			0			0			0			0			0			0.9	A4Lac1G1S1
			0			0			0			1			0.2			0	FA2F2G2S2
			20.68			19.35			19.5			13.37			20.18			18.32	A3G3S3
			0.3			0.3			0.3			0.3			0.3			0.1	FA3F1G3S2/FA2F1G2Lac1S(3)2
			0.09			0.09			0.09			0.09			0.09			0.1	FA2F2G2Lac1F1S(3)1
			0.58			1.58			0.58			0.58			0.58			0.58	FA3'G3KDN3
32	11.69	7.32	3.61	11.7	6.73	4.03	11.7	7.29	3.98	11.69	4.76	2.26	11.68	5.01	4.21	11.7	4.43	3.83	A3G3S3	32	32	32	32	32	32	32	32	32	32	32	32	32	32	32	32	32	32	32	32	32	32	32	32	32	32	32	32	32	32
			0.2			0.1			0.1			0.01			0.2			0	A3F2G3S2
			0.2			0.1			0.1			0.01			0.2			0.2	A3F2G3S3
			2.2			2.2			2			0.87			0			0	A3G3S2(acet)
			0.2			0.1			0.2			0.2			0.2			0.2	M5A1G1S1
			0.91			0.2			0.91			0.91			0.2			0.2	FA3'BF1G1S2
			0			0			0			0.5			0			0	A3F1G2S2
33	11.82	3.62	1.88	11.83	3.62	1.88	11.83	3.42	1.68	11.81	2.57	0.47	11.81	3.48	1.96	11.82	3.1	2.2	A3G3S3	33	33	33	33	33	33	33	33	33	33	33	33	33	33	33	33	33	33	33	33	33	33	33	33	33	33	33	33	33	33
			0.3			0.3			0.3			0.3			0.9			0.5	FA3F1G3S2/FA2F1G2Lac1S2
			0.2			0.2			0.2			0.2			0.2			0	A3F2G3S2
			0.02			0.02			0.02			0.1			0.02			0	A3G3S4
			1.22			1.22			1.22			1.5			0.4			0.4	A3'G3S3
34	12.08	6.24	1.81	12.09	5.92	1.49	12.09	6.04	1.61	12.08	4.11	0.38	12.08	4.07	1.25	12.09	3.55	0.11	A3G3S3	34	34	34	34	34	34	34	34	34	34	34	34	34	34	34	34	34	34	34	34	34	34	34	34	34	34	34	34	34	34
			0.3			0.3			0.3			0.6			0.02			0.02	A2G3Lac1S2
			0.1			0.1			0.1			0.1			0.1			0.1	FA3F1G3S2/FA2F1G2Lac1S2
			1			1			1			1			0.3			0.3	A3'G3S3
			0.01			0.01			0.01			0.01			0.01			0.01	FA3'BF1G1S2
			0			0			0			0			0			1	FA3'G3S3
			3			3			3			1.5			0			2	A3G3S4
			0.01			0.01			0.01			0.01			0.01			0.01	A3F2G3S3
			0			0			0			0			2.38			0	M5A2G2S2
35	12.5	1.52	0.5	12.52	1.29	0.5	12.51	1.55	0.5	12.51	1.54	0.2	12.5	1.02	0.35	12.52	0.75	0.4	FA4F1G1S2	35	35	35	35	35	35	35	35	35	35	35	35	35	35	35	35	35	35	35	35	35	35	35	35	35	35	35	35	35	35
			1.02			0.79			1.05			0.8			0.36			0.2	FA3BG3S4
			0			0			0			0.14			0.01			0	FA3G3S3
			0			0			0			0			0.1			0	A3'BG3S3
			0			0			0			0			0.05			0.1	A4G3S3
			0			0			0			0.7			0.1			0.05	A3F2G3S3
			0			0			0			0.2			0.05			0	A4G4S4
36	12.71	0.58	0.47	12.72	0.56	0.44	12.72	0.59	0.51	12.71	0.57	0.47	12.71	0.5	0.5	12.72	0.42	0.42	A2G3Lac1S2	36	36	36	36	36	36	36	36	36	36	36	36	36	36	36	36	36	36	36	36	36	36	36	36	36	36	36	36	36	36
			0.11			0.12			0.08			0.1			0			0	FA3'BG3S(3)4
37	12.98	0.32	0.32	13.02	0.31	0.31	13.01	0.35	0.35	12.96	0.64	0.64	13.1	0.31	0.31	13.01	0.28	0.28	FA3'BG3S(3)4	37	37	37	37	37	37	37	37	37	37	37	37	37	37	37	37	37	37	37	37	37	37	37	37	37	37	37	37	37	37
38	13.35	0.28	0.28	13.38	0.21	0.28	13.37	0.26	0.28	13.32	0.32	0.32	13.35	0.35	0.35	13.4	0.24	0.24	FA4G3S(3)4	38	38	38	38	38	38	38	38	38	38	38	38	38	38	38	38	38	38	38	38	38	38	38	38	38	38	38	38	38	38
			100.01			100.01			99.83			99.8			100.01			99.99
[truncated: 110 more columns]

## Sheet: info
The features were generated using main glycans in each GP peak in each cell line.
Feature description	Which GP peaks summarized based on their major glycans
Fucosylated-core only	only peaks containing core fucosylated glycans and no outer arm fucosylated glycans
Fucosylated-core	all peaks containing core fucosylated glycans
Fucosylated-outer arm only	only peaks containing outer arm fucosylated glycans and no core fucosylated glycans
Fucosylated-outer arm	all peaks containing outer arm fucosylated glycans
Fucosylated- both	all peaks containing both core and outer arm fucosylated glycans
Oligoman	all peaks containing oligomannosylated glycans
Hybrids	all peaks containing hybrid glycans
Bisects	all peaks containing bisecting glycans
Lacs (no aof)	all polylactoseamine extension containing glycans but with no outer arm fucose
Lac+oaf	all polylactoseamine extension containing glycans with outer arm fucose
Branching	all peaks containing one (A1), two (A2), three (A3) or four (A4) branches
Galactosylation	all peaks containing zero (G0), one (G1), two (G2) or three (G3) galactoses
Sialylation	all peaks containing zero (S0), one (S1), two (S2), three (S3) or four (S4) sialic acids
The individual peaks counted into the particular feature are highlighted.
Structure abbreviations: all N-glycans have two core GlcNAcs; F at the start of the abbreviation indicates a core-fucose α1,6-linked to the inner GlcNAc; Mx, number (x) of mannose on core GlcNAcs; D1 indicates that the α1-2 mannose is on the Manα1-6Manα1-6 arm, D2 on the Manα1-3Manα1-6 arm, D3 on the Manα1-3 arm of M6 and on the Manα1-2Manα1-3 arm of M7 and M8; Ax, number of antenna (GlcNAc) on t…
